# Supplementary material for: Evaluation of InfraRed Thermography Supported by UAV and Field Surveys for Rock Mass Characterization in Complex Settings
Source: MDPI journal article supplement (doi:10.3390/geosciences12030116), 2022-03-02
Supplement: s1 [file s1]

**Table S1.** Calibration parameters measured during the acquisition process (21-22 December 2020) for the correction of the apparent temperatures. The ambient air temperature and relative humidity were measured by means of a pocket-size digital thermo-hydrometer, the reflected temperature was calculated using a reflective target at the base of the cliff to calculate the real temperatures [3,71,72].

| Time of<br>thermogram<br>acquisition<br>CET | Ambient air<br>temperature<br>°C | Relative<br>humidity % | Reflected<br>apparent<br>temperature<br>°C | Time of<br>thermogram<br>acquisition<br>CET | Ambient air<br>temperature<br>°C | Relative<br>humidity % | Reflected<br>apparent<br>temperature<br>°C |
|---------------------------------------------|----------------------------------|------------------------|--------------------------------------------|---------------------------------------------|----------------------------------|------------------------|--------------------------------------------|
| 17:45                                       | 15                               | 72                     | 13.4                                       | 5:45                                        | 9.5                              | 96                     | 8.2                                        |
| 18:05                                       | 12.5                             | 83                     | 13.1                                       | 6:05                                        | 9                                | 96                     | 7.7                                        |
| 18:25                                       | 12                               | 86                     | 13.7                                       | 6:25                                        | 8.5                              | 95.5                   | 7.4                                        |
| 18:45                                       | 11.5                             | 88                     | 13.4                                       | 6:45                                        | 8.5                              | 96                     | 6.6                                        |
| 19:05                                       | 11.5                             | 89                     | 11.7                                       | 7:25                                        | 8.5                              | 95.5                   | 6.5                                        |
| 19:25                                       | 11.5                             | 90.5                   | 12.4                                       | 7:45                                        | 9                                | 94.5                   | 8.4                                        |
| 19:45                                       | 11                               | 91                     | 11.7                                       | 8:05                                        | 10                               | 94.5                   | 11                                         |
| 20:05                                       | 11                               | 92                     | 13                                         | 8:25                                        | 11.5                             | 90                     | 11.1                                       |
| 20:25                                       | 11                               | 92                     | 12.8                                       | 8:45                                        | 14                               | 88                     | 8.4                                        |
| 20:45                                       | 11                               | 92                     | 12.3                                       | 9:05                                        | 21                               | 65.5                   | 8.4                                        |
| 21:05                                       | 11                               | 92.5                   | 10.7                                       | 9:25                                        | 20.5                             | 63                     | 8.2                                        |
| 21:25                                       | 11                               | 93                     | 9.7                                        | 9:45                                        | 23.5                             | 54                     | 8.7                                        |
| 21:45                                       | 10.5                             | 93.5                   | 10                                         | 10:05                                       | 26                               | 48.5                   | 8                                          |
| 22:05                                       | 10.5                             | 94                     | 10.2                                       | 10:25                                       | 26                               | 48.5                   | 8.5                                        |
| 22:25                                       | 10                               | 94                     | 12.3                                       | 10:45                                       | 26                               | 48                     | 8.9                                        |
| 22:45                                       | 10                               | 94.5                   | 12.1                                       | 11:05                                       | 24.5                             | 49.5                   | 8.7                                        |
| 23:05                                       | 10.5                             | 94.5                   | 11.9                                       | 11:25                                       | 24.5                             | 50                     | 9.9                                        |
| 23:25                                       | 10.5                             | 94.5                   | 12.4                                       | 11:45                                       | 25.5                             | 48                     | 8.9                                        |
| 23:45                                       | 10.5                             | 94                     | 12.6                                       | 12:05                                       | 29                               | 41                     | 10.3                                       |
| 0:05                                        | 10.5                             | 94                     | 9.9                                        | 12:25                                       | 27                               | 44                     | 9.6                                        |
| 0:25                                        | 10                               | 95                     | 11.5                                       | 12:45                                       | 30.5                             | 39                     | 10.8                                       |
| 0:45                                        | 10.5                             | 94.5                   | 12.3                                       | 13:05                                       | 25                               | 47                     | 11.8                                       |
| 1:05                                        | 10.5                             | 94                     | 10.2                                       | 13:25                                       | 23.5                             | 52.5                   | 11.4                                       |
| 1:25                                        | 10                               | 95                     | 8.4                                        | 13:45                                       | 26.5                             | 47                     | 11.6                                       |
| 1:45                                        | 9.5                              | 95                     | 10.7                                       | 14:05                                       | 25.5                             | 47                     | 13.3                                       |
| 2:05                                        | 9.5                              | 95                     | 10.8                                       | 14:25                                       | 22.5                             | 52                     | 12.9                                       |
| 2:25                                        | 9.5                              | 95                     | 10.6                                       | 14:45                                       | 17.5                             | 64                     | 12.3                                       |
| 2:45                                        | 9.5                              | 96                     | 8.9                                        | 15:05                                       | 16.5                             | 68                     | 11.7                                       |
| 3:05                                        | 9.5                              | 95.5                   | 7.6                                        | 15:25                                       | 15.5                             | 71                     | 11.6                                       |
| 3:25                                        | 9.5                              | 95.5                   | 10.2                                       | 15:45                                       | 14.5                             | 74                     | 11                                         |
| 3:45                                        | 9.5                              | 95                     | 10                                         | 16:05                                       | 14                               | 77                     | 9.5                                        |
| 4:05                                        | 10                               | 95                     | 11.7                                       | 16:25                                       | 13                               | 80                     | 10                                         |
| 4:25                                        | 10                               | 95                     | 11.6                                       | 16:45                                       | 12.5                             | 82.5                   | 10.4                                       |
| 4:45                                        | 10.5                             | 94.5                   | 10.9                                       | 17:05                                       | 12.5                             | 83                     | 10.3                                       |
| 5:05                                        | 10                               | 94                     | 7.6                                        | 17:25                                       | 12                               | 83.5                   | 10                                         |
| 5:25                                        | 9.5                              | 95.5                   | 7.5                                        | 17:45                                       | 11.5                             | 84                     | 10.6                                       |
| 7:05                                        | 9                                | 95.5                   | 6.6                                        |                                             |                                  |                        |                                            |
